# Supplementary material for: Unmet Health Care Needs of the Older Population in European Countries Based on Indicators Available in the Eurostat Database
Source: MDPI journal article supplement (doi:10.3390/healthcare11192692), 2023-10-08
Supplement: s1 [file s1]

## Supplementary Materials

**Table S1.** Information about UHCN indicators: EHIS indicator and EU-SILC indicator

|                                                            | <b>EHIS indicator</b>                                                                                                                                                                                                                                                    | <b>EU-SILC indicator</b>                                                                                                           |
|------------------------------------------------------------|--------------------------------------------------------------------------------------------------------------------------------------------------------------------------------------------------------------------------------------------------------------------------|------------------------------------------------------------------------------------------------------------------------------------|
| The source of information for indicator construction       | questionnaire survey (the European Health Interview Survey)                                                                                                                                                                                                              | questionnaire survey (the EU Statistics on Income and Living Conditions)                                                           |
| Name of variable used in the research                      | UN1A: Unmet need for health care in the past 12 months due to long waiting list;<br>UN1B: Unmet need for health care in the past 12 months due to distance or transportation problems;<br>UN2A: Could not afford medical examination or treatment in the past 12 months. | PH040: Unmet need for medical examination or treatment;<br>PH050: Main reason for unmet need for medical examination or treatment. |
| Type of used information                                   | self-reported, subjective                                                                                                                                                                                                                                                | self-reported, subjective                                                                                                          |
| Construction of indicator:<br>- nominator<br>- denominator | - number of people with UHCN<br>- number of people in need of health care                                                                                                                                                                                                | - number of people with UHCN<br>- total population (with and without need of health care)                                          |
| Scope of health care taken into account                    | broadly understood, defined according to the System of Health Accounts as individual health care goods and services                                                                                                                                                      | separately for a medical and dental care (medical goods excluded)                                                                  |
| Population included                                        | 15 years and older                                                                                                                                                                                                                                                       | 16 years and older                                                                                                                 |
| “Unmet needs” understanding                                | delayed or forgone care                                                                                                                                                                                                                                                  | forgone care                                                                                                                       |
| Number of reasons of UHCN possible to indicate             | 3                                                                                                                                                                                                                                                                        | 7 + “other reason” option                                                                                                          |
| Reference period                                           | last 12 months                                                                                                                                                                                                                                                           | last 12 months                                                                                                                     |

Source: Eurostat. Quality report of the third wave of the European Health Interview Survey. 2022 edition. Publication Office of the European Union. Luxembourg (ref.41 in the main text) and Eurostat. Unmet Health Care Needs Statistics. Available online: [https://ec.europa.eu/eurostat/statistics-explained/index.php?title=Unmet\\_health\\_care\\_needs\\_statistics](https://ec.europa.eu/eurostat/statistics-explained/index.php?title=Unmet_health_care_needs_statistics) (accessed 30 April 2023) (ref.14 in the main text)

## Questionnaire S1

The European Health Interview Survey questions regarding used indicators:

### UN1A: Unmet need for health care in the past 12 months due to long waiting lists

**Question:** Have you experienced delay in getting health care in the past 12 months because the time needed to obtain an appointment was too long?

1. Yes
2. No
3. No need for health care

### UN1B: Unmet need for health care in the past 12 months due to distance or transportation problems

**Question:** Have you experienced delay in getting health care in the past 12 months due to distance or transportation problems?

1. Yes
2. No
3. No need for health care

### UN2: Could not afford [*kind of care: medical care/dental care/prescribed medicines/mental health care*] in the past 12 months

**Question:** Was there any time in the past 12 months when you needed the following kinds of health care, but could not afford it?

1. Yes
2. No
3. No need for [*kind of care*]

*Source: Eurostat. Quality report of the third wave of the European Health Interview Survey. 2022 edition. Publication Office of the European Union. Luxembourg (ref.41 in the main text)*

**Table S2.** Sample size in the European Health Interview Survey – national level (countries analyzed in the study)

| Country          | Achieved effective sample size | Minimum effective sample size | Ratio of the achieved to minimum effective sample size | Total population (15+) (2019) |
|------------------|--------------------------------|-------------------------------|--------------------------------------------------------|-------------------------------|
| Austria (AT)     | 12 778                         | 6 104                         | 2.09                                                   | 7 580 083                     |
| Bulgaria (BG)    | 5 273                          | 5 738                         | 0.92                                                   | 5 995 194                     |
| Croatia (HR)     | 1 986                          | 5 041                         | 0.39                                                   | 3 488 460                     |
| Cyprus (CY)      | 6 413                          | 3 829                         | 1.67                                                   | 734 695                       |
| Czechia (CZ)     | 7 612                          | 6 391                         | 1.19                                                   | 8 956 740                     |
| Denmark (DK)     | 6 629                          | 5 442                         | 1.22                                                   | 4 848 611                     |
| Estonia (EE)     | 4 833                          | 4 063                         | 1.19                                                   | 1 107 397                     |
| Finland (FI)     | 6 251                          | 5 384                         | 1.16                                                   | 4 635 685                     |
| France (FR)      | N/A                            | 11 705                        | N/A                                                    | 55 064 279                    |
| Germany (DE)     | 9 056                          | 12 963                        | 0.70                                                   | 71 728 398                    |
| Greece (GR)      | N/A                            | N/A                           | N/A                                                    | 9 187 524                     |
| Hungary (HU)     | 7 004                          | 6 268                         | 1.12                                                   | 8 351 017                     |
| Iceland (IS)     | N/A                            | N/A                           | N/A                                                    | 289 174                       |
| Ireland (IE)     | 5 115                          | 5 169                         | 0.99                                                   | 3 896 482                     |
| Italy (IT)       | 32 597                         | 11 449                        | 2.85                                                   | 51 944 786                    |
| Latvia (LV)      | 12 066                         | 4 325                         | 2.79                                                   | 1 614 888                     |
| Lithuania (LT)   | 5 075                          | 4 648                         | 1.09                                                   | 2 372 327                     |
| Luxembourg (LU)  | 4 416                          | 3 661                         | 1.21                                                   | 515 287                       |
| Malta (MT)       | N/A                            | 3 583                         | N/A                                                    | 426 055                       |
| Netherlands (NL) | 7 587                          | 7 376                         | 1.03                                                   | 14 542 344                    |
| Norway (NO)      | 6 381                          | 5 315                         | 1.20                                                   | 4 393 254                     |
| Poland (PL)      | 11 088                         | 9 603                         | 1.15                                                   | 32 139 021                    |
| Portugal (PT)    | 7 236                          | 6 374                         | 1.14                                                   | 8 869 051                     |
| Romania (RO)     | N/A                            | 7 656                         | N/A                                                    | 16 372 216                    |
| Slovakia (SK)    | 5 527                          | 5 372                         | 1.03                                                   | 4 592 379                     |
| Slovenia (SI)    | 9 706                          | 4 395                         | 2.21                                                   | 1 767 202                     |
| Spain (ES)       | 13 882                         | 10 390                        | 1.34                                                   | 40 006 943                    |
| Sweden (SE)      | 8 131                          | 6 280                         | 1.29                                                   | 8 410 456                     |

Notes: N/A – data non-available

Source: Eurostat. Quality report of the third wave of the European Health Interview Survey. 2022 edition. Publication Office of the European Union. Luxembourg (ref.41 in the main text)

**Table S3.** Self-reported UHCN by age and reasons in 2019 (%)

| Country     | Total UHCN |       |      |       |      | UHCN due to financial reasons |       |      |       |      | UHCN due to distance or transportation issues |       |      |       |      | UHCN due to overlong waiting lists |       |      |       |      |
|-------------|------------|-------|------|-------|------|-------------------------------|-------|------|-------|------|-----------------------------------------------|-------|------|-------|------|------------------------------------|-------|------|-------|------|
|             | total      | 15-64 | 65+  | 65-74 | 75+  | total                         | 15-64 | 65+  | 65-74 | 75+  | total                                         | 15-64 | 65+  | 65-74 | 75+  | total                              | 15-64 | 65+  | 65-74 | 75+  |
| Austria     | 24.9       | 26.2  | 20.1 | 20.8  | 19.2 | 10.8                          | 11.8  | 7.2  | 7.7   | 6.6  | 2.8                                           | 2.6   | 3.3  | 2.7   | 3.9  | 20.4                               | 21.9  | 15.7 | 16.5  | 14.8 |
| Bulgaria    | 15.9       | 12.9  | 22.1 | 20.7  | 24.0 | 14.5                          | 11.4  | 20.7 | 18.7  | 23.5 | 2.9                                           | 2.1   | 4.7  | 4.3   | 5.2  | 4.9                                | 4.4   | 5.9  | 5.9   | 5.9  |
| Croatia     | 33.0       | 28.9  | 40.3 | 38.8  | 41.6 | 17.9                          | 16.2  | 20.8 | 18.9  | 22.5 | 7.8                                           | 5.8   | 11.0 | 10.8  | 11.1 | 26.3                               | 23.5  | 31.0 | 33.4  | 29.0 |
| Cyprus      | 5.8        | 5.4   | 7.5  | 7.8   | 7.2  | 3.7                           | 3.7   | 3.8  | 4.4   | 2.8  | 0.1                                           | 0.1   | 0.4  | 0.1   | 0.7  | 3.3                                | 2.8   | 5.2  | 5.3   | 5.1  |
| Czechia     | 17.9       | 16.5  | 21.9 | 21.3  | 22.9 | 7.1                           | 6.3   | 9.3  | 8.8   | 10.0 | 5.1                                           | 3.8   | 8.8  | 7.2   | 11.5 | 14.2                               | 13.8  | 15.3 | 15.6  | 14.8 |
| Denmark     | 33.0       | 36.8  | 20.9 | 20.9  | 21.0 | 22.4                          | 26.1  | 10.5 | 9.8   | 11.6 | 4.2                                           | 4.5   | 3.3  | 3.2   | 3.4  | 24.5                               | 27.0  | 17.1 | 18.1  | 15.6 |
| Estonia     | 37.1       | 38.5  | 32.8 | 33.7  | 31.8 | 26.0                          | 27.6  | 21.1 | 22.2  | 19.9 | 3.6                                           | 3.4   | 4.2  | 2.3   | 6.2  | 25.6                               | 26.9  | 21.9 | 22.6  | 21.1 |
| Finland     | 36.3       | 38.4  | 30.7 | 29.4  | 33.0 | 25.7                          | 29.7  | 14.3 | 14.8  | 13.3 | 4.2                                           | 4.2   | 4.1  | 3.8   | 4.6  | 24.7                               | 25.5  | 23.0 | 22.1  | 24.5 |
| France      | 29.5       | 32.0  | 21.5 | 24.3  | 17.8 | 12.7                          | 13.9  | 8.8  | 10.1  | 7.1  | 4.4                                           | 4.9   | 3.2  | 2.6   | 4.0  | 23.9                               | 26.9  | 15.3 | 18.0  | 11.6 |
| Germany     | 26.9       | 29.6  | 19.4 | 20.3  | 18.6 | 13.2                          | 14.7  | 9.0  | 10.1  | 8.0  | 4.8                                           | 5.0   | 4.0  | 3.0   | 4.8  | 21.3                               | 24.5  | 13.2 | 14.0  | 12.5 |
| Greece      | 19.7       | 18.4  | 23.5 | 25.1  | 21.7 | 14.4                          | 14.1  | 15.1 | 16.8  | 13.4 | 5.0                                           | 3.3   | 8.7  | 7.8   | 9.7  | 12.5                               | 10.9  | 16.1 | 17.7  | 14.4 |
| Hungary     | 22.5       | 23.2  | 20.3 | 21.5  | 18.7 | 14.1                          | 15.1  | 11.3 | 12.4  | 9.9  | 2.9                                           | 2.7   | 3.6  | 3.9   | 3.1  | 13.3                               | 13.6  | 12.4 | 13.2  | 11.3 |
| Iceland     | 32.5       | 36.1  | 21.9 | 26.8  | 15.3 | 15.2                          | 18.1  | 6.3  | 7.6   | 4.6  | 4.4                                           | 5.2   | 2.1  | 1.2   | 3.4  | 33.1                               | 36.0  | 24.2 | 29.7  | 16.1 |
| Ireland     | 22.8       | 23.9  | 17.8 | 19.1  | 15.9 | 12.1                          | 13.4  | 6.4  | 7.5   | 4.7  | 2.3                                           | 2.3   | 2.6  | 2.9   | 2.2  | 18.3                               | 19.2  | 14.6 | 15.8  | 12.7 |
| Italy       | 26.6       | 25.2  | 29.9 | 29.1  | 30.7 | 13.6                          | 14.1  | 12.6 | 12.2  | 12.9 | 8.3                                           | 7.4   | 10.2 | 9.3   | 11.1 | 25.2                               | 24.2  | 27.3 | 27.5  | 27.2 |
| Latvia      | 36.9       | 37.0  | 36.6 | 41.5  | 31.4 | 25.9                          | 25.9  | 26.0 | 29.4  | 22.4 | 5.8                                           | 4.6   | 9.0  | 8.3   | 9.7  | 25.6                               | 26.3  | 23.7 | 29.3  | 17.9 |
| Lithuania   | 26.2       | 26.2  | 26.2 | 26.5  | 25.9 | 14.8                          | 14.8  | 14.7 | 15.6  | 13.8 | 3.3                                           | 2.9   | 4.4  | 1.9   | 7.1  | 19.7                               | 20.6  | 17.2 | 18.1  | 16.4 |
| Luxembourg  | 38.8       | 41.3  | 26.6 | 23.9  | 33.1 | 13.3                          | 14.9  | 5.6  | 5.6   | 5.7  | 5.4                                           | 5.3   | 5.7  | 2.8   | 12.8 | 35.8                               | 38.9  | 22.2 | 20.9  | 25.5 |
| Malta       | 21.5       | 20.3  | 25.7 | 25.0  | 26.7 | 6.0                           | 5.9   | 6.5  | 6.9   | 5.8  | 2.3                                           | 1.7   | 4.4  | 3.1   | 6.8  | 17.0                               | 16.1  | 20.3 | 20.7  | 19.4 |
| Netherlands | 15.4       | 17.0  | 10.1 | 9.9   | 10.6 | 5.3                           | 6.5   | 1.5  | 1.9   | 0.9  | 2.5                                           | 2.6   | 2.4  | 1.1   | 3.9  | 17.5                               | 18.9  | 12.8 | 13.8  | 11.5 |
| Norway      | 11.7       | 14.3  | 2.4  | 2.9   | 1.7  | 8.7                           | 10.7  | 1.2  | 1.5   | 0.9  | 1.3                                           | 1.4   | 0.6  | 0.8   | 0.3  | 3.9                                | 4.8   | 0.9  | 1.1   | 0.7  |
| Poland      | 29.6       | 27.3  | 37.9 | 37.8  | 38.0 | 12.7                          | 11.5  | 16.9 | 16.7  | 17.2 | 4.3                                           | 3.5   | 7.0  | 5.7   | 9.0  | 25.7                               | 23.9  | 31.5 | 31.8  | 31.1 |
| Portugal    | 39.9       | 39.4  | 41.4 | 40.8  | 42.0 | 25.6                          | 26.3  | 23.8 | 24.0  | 23.5 | 3.9                                           | 3.4   | 5.2  | 4.6   | 5.8  | 29.5                               | 29.0  | 30.6 | 29.9  | 31.5 |
| Romania     | 13.8       | 10.4  | 24.7 | 24.6  | 24.7 | 12.1                          | 9.2   | 21.0 | 21.3  | 20.7 | 1.7                                           | 1.0   | 3.9  | 3.3   | 4.6  | 3.6                                | 2.5   | 7.2  | 6.7   | 7.9  |
| Slovakia    | 10.9       | 9.6   | 15.4 | 15.1  | 15.9 | 5.9                           | 5.1   | 8.9  | 8.9   | 8.9  | 2.0                                           | 1.7   | 3.1  | 2.4   | 4.1  | 7.1                                | 6.6   | 8.7  | 9.1   | 8.0  |
| Slovenia    | 28.0       | 29.7  | 22.6 | 23.4  | 21.5 | 15.6                          | 17.4  | 10.4 | 11.5  | 9.0  | 3.1                                           | 3.2   | 2.7  | 1.8   | 3.6  | 22.8                               | 24.7  | 17.5 | 19.0  | 15.7 |
| Spain       | 19.6       | 19.9  | 18.6 | 19.9  | 16.9 | 10.3                          | 11.0  | 7.9  | 8.5   | 7.3  | 1.1                                           | 1.1   | 1.4  | 1.2   | 1.5  | 13.1                               | 13.1  | 13.2 | 14.3  | 11.9 |
| Sweden      | 31.7       | 33.7  | 26.6 | 26.6  | 26.5 | 20.7                          | 22.8  | 15.6 | 16.1  | 14.9 | 3.5                                           | 3.5   | 3.4  | 2.2   | 4.7  | 24.4                               | 26.2  | 19.6 | 20.4  | 18.6 |

Notes: sorted alphabetically by countries

**Table S4.** Self-reported UHCN by age and educational level in 2019 (%)

| Country         | Age group          |            |            |      |      |                    |                    |            |            |      |      |                    |                    |            |            |      |      |                    |                    |            |            |      |      |                    |
|-----------------|--------------------|------------|------------|------|------|--------------------|--------------------|------------|------------|------|------|--------------------|--------------------|------------|------------|------|------|--------------------|--------------------|------------|------------|------|------|--------------------|
|                 | 65+                |            |            |      |      |                    | 65-74              |            |            |      |      |                    | 75+                |            |            |      |      |                    | 15-64              |            |            |      |      |                    |
|                 | Educational levels |            |            |      |      |                    | Educational levels |            |            |      |      |                    | Educational levels |            |            |      |      |                    | Educational levels |            |            |      |      |                    |
|                 | Levels 0-2         | Levels 3-4 | Levels 5-8 | min  | max  | range <sup>1</sup> | Levels 0-2         | Levels 3-4 | Levels 5-8 | min  | max  | range <sup>1</sup> | Levels 0-2         | Levels 3-4 | Levels 5-8 | min  | max  | range <sup>1</sup> | Levels 0-2         | Levels 3-4 | Levels 5-8 | min  | max  | range <sup>1</sup> |
| Austria         | 20.2               | 19.6       | 20.8       | 19.6 | 20.8 | 1.2                | 21.6               | 19.8       | 22.4       | 19.8 | 22.4 | 2.6                | 19.3               | 19.4       | 18.5       | 18.5 | 19.4 | 0.9                | 24.6               | 26.5       | 26.5       | 24.6 | 26.5 | 1.9                |
| Bulgaria        | 26.3               | 21.7       | 16.1       | 16.1 | 26.3 | 10.2               | 28.7               | 19.8       | 14.8       | 14.8 | 28.7 | 13.9               | 24.6               | 25.3       | 18.8       | 18.8 | 25.3 | 6.5                | 22.3               | 11.5       | 9.4        | 9.4  | 22.3 | 12.9               |
| Croatia         | 38.5               | 38.7       | 49.3       | 38.5 | 49.3 | 10.8               | 37.7               | 36.5       | 48.2       | 36.5 | 48.2 | 11.7               | 39.0               | 41.7       | 50.5       | 39.0 | 50.5 | 11.5               | 29.2               | 29.7       | 27.0       | 27.0 | 29.7 | 2.7                |
| Cyprus          | 8.5                | 7.4        | 3.8        | 3.8  | 8.5  | 4.7                | 10.6               | 5.6        | 3.6        | 3.6  | 10.6 | 7.0                | 6.3                | 10.9       | 4.3        | 4.3  | 10.9 | 6.6                | 6.3                | 6.5        | 4.0        | 4.0  | 6.5  | 2.5                |
| Czechia         | 20.6               | 22.2       | 22.1       | 20.6 | 22.2 | 1.6                | 16.3               | 22.2       | 20.9       | 16.3 | 22.2 | 5.9                | 24.4               | 22.2       | 24.1       | 22.2 | 24.4 | 2.2                | 20.0               | 16.5       | 14.8       | 14.8 | 20.0 | 5.2                |
| Denmark         | 22.1               | 20.7       | 20.0       | 20.0 | 22.1 | 2.1                | 23.2               | 19.5       | 20.6       | 19.5 | 23.2 | 3.7                | 21.2               | 22.5       | 18.7       | 18.7 | 22.5 | 3.8                | 43.5               | 39.9       | 30.8       | 30.8 | 43.5 | 12.7               |
| Estonia         | 32.5               | 30.1       | 36.4       | 30.1 | 36.4 | 6.3                | 34.5               | 31.9       | 35.8       | 31.9 | 35.8 | 3.9                | 31.5               | 28.0       | 37.3       | 28.0 | 37.3 | 9.3                | 35.3               | 40.0       | 37.9       | 35.3 | 40.0 | 4.7                |
| Finland         | 32.8               | 31.4       | 27.0       | 27.0 | 32.8 | 5.8                | 32.1               | 31.7       | 23.6       | 23.6 | 32.1 | 8.5                | 33.5               | 30.6       | 34.3       | 30.6 | 34.3 | 3.7                | 42.9               | 44.2       | 29.0       | 29.0 | 44.2 | 15.2               |
| France          | 21.0               | 23.7       | 22.2       | 21.0 | 23.7 | 2.7                | 24.0               | 25.4       | 24.4       | 24.0 | 25.4 | 1.4                | 17.6               | 20.4       | 17.7       | 17.6 | 20.4 | 2.8                | 28.2               | 31.4       | 37.0       | 28.2 | 37.0 | 8.8                |
| Germany         | 21.3               | 19.1       | 17.5       | 17.5 | 21.3 | 3.8                | 24.8               | 20.1       | 17.0       | 17.0 | 24.8 | 7.8                | 19.5               | 18.1       | 18.0       | 18.0 | 19.5 | 1.5                | 33.1               | 30.0       | 26.1       | 26.1 | 33.1 | 7.0                |
| Greece          | 27.0               | 19.6       | 15.0       | 15.0 | 27.0 | 12.0               | 30.4               | 23.4       | 14.4       | 14.4 | 30.4 | 16.0               | 24.6               | 12.1       | 16.2       | 12.1 | 24.6 | 12.5               | 28.2               | 19.5       | 10.7       | 10.7 | 28.2 | 17.5               |
| Hungary         | 15.5               | 20.8       | 25.8       | 15.5 | 25.8 | 10.3               | 15.4               | 23.5       | 21.8       | 15.4 | 23.5 | 8.1                | 15.6               | 15.0       | 32.7       | 15.0 | 32.7 | 17.7               | 23.2               | 22.7       | 24.1       | 22.7 | 24.1 | 1.4                |
| Iceland         | 20.4               | 23.8       | 22.0       | 20.4 | 23.8 | 3.4                | 25.2               | 29.7       | 24.5       | 24.5 | 29.7 | 5.2                | 16.0               | 13.6       | 16.4       | 13.6 | 16.4 | 2.8                | 37.4               | 36.8       | 34.4       | 34.4 | 37.4 | 3.0                |
| Ireland         | 18.9               | 18.0       | 15.3       | 15.3 | 18.9 | 3.6                | 19.9               | 21.0       | 15.6       | 15.6 | 21.0 | 5.4                | 17.6               | 12.5       | 14.5       | 12.5 | 17.6 | 5.1                | 23.4               | 26.3       | 21.6       | 21.6 | 26.3 | 4.7                |
| Italy           | 30.2               | 29.8       | 26.5       | 26.5 | 30.2 | 3.7                | 29.5               | 28.9       | 26.6       | 26.6 | 29.5 | 2.9                | 30.8               | 31.7       | 26.4       | 26.4 | 31.7 | 5.3                | 28.2               | 24.2       | 21.8       | 21.8 | 28.2 | 6.4                |
| Latvia          | 39.0               | 37.8       | 31.2       | 31.2 | 39.0 | 7.8                | 50.3               | 42.3       | 34.7       | 34.7 | 50.3 | 15.6               | 34.3               | 31.1       | 26.3       | 26.3 | 34.3 | 8.0                | 38.2               | 39.8       | 31.8       | 31.8 | 39.8 | 8.0                |
| Lithuania       | 27.4               | 25.9       | 25.8       | 25.8 | 27.4 | 1.6                | 30.0               | 26.6       | 25.3       | 25.3 | 30.0 | 4.7                | 26.8               | 25.0       | 26.7       | 25.0 | 26.8 | 1.8                | 22.4               | 24.3       | 29.3       | 22.4 | 29.3 | 6.9                |
| Luxembourg      | 29.5               | 26.6       | 23.0       | 23.0 | 29.5 | 6.5                | 29.7               | 24.2       | 20.0       | 20.0 | 29.7 | 9.7                | 29.0               | 33.2       | 31.6       | 29.0 | 33.2 | 4.2                | 34.9               | 40.1       | 43.7       | 34.9 | 43.7 | 8.8                |
| Malta           | 25.4               | 31.5       | 22.9       | 22.9 | 31.5 | 8.6                | 24.7               | 29.8       | 22.8       | 22.8 | 29.8 | 7.0                | 26.5               | 35.0       | 22.9       | 22.9 | 35.0 | 12.1               | 22.2               | 17.8       | 19.2       | 17.8 | 22.2 | 4.4                |
| Netherlands     | 9.6                | 10.9       | 10.3       | 9.6  | 10.9 | 1.3                | 8.3                | 13.0       | 8.9        | 8.3  | 13.0 | 4.7                | 11.1               | 7.3        | 12.9       | 7.3  | 12.9 | 5.6                | 17.8               | 16.9       | 16.4       | 16.4 | 17.8 | 1.4                |
| Norway          | 4.3                | 1.8        | 1.6        | 1.6  | 4.3  | 2.7                | 5.9                | 2.5        | 1.7        | 1.7  | 5.9  | 4.2                | 3.1                | 1.0        | 1.3        | 1.0  | 3.1  | 2.1                | 19.0               | 14.5       | 11.1       | 11.1 | 19.0 | 7.9                |
| Poland          | 36.0               | 37.7       | 41.8       | 36.0 | 41.8 | 5.8                | 36.6               | 36.9       | 43.2       | 36.6 | 43.2 | 6.6                | 35.6               | 39.4       | 39.6       | 35.6 | 39.6 | 4.0                | 22.0               | 27.4       | 29.2       | 22.0 | 29.2 | 7.2                |
| Portugal        | 44.0               | 30.6       | 21.9       | 21.9 | 44.0 | 22.1               | 43.9               | 32.3       | 23.0       | 23.0 | 43.9 | 20.9               | 44.1               | 25.1       | 20.2       | 20.2 | 44.1 | 23.9               | 45.1               | 35.8       | 32.0       | 32.0 | 45.1 | 13.1               |
| Romania         | 26.7               | 22.8       | 17.9       | 17.9 | 26.7 | 8.8                | 27.8               | 22.8       | 18.7       | 18.7 | 27.8 | 9.1                | 25.9               | 22.7       | 16.5       | 16.5 | 25.9 | 9.4                | 15.8               | 10.0       | 5.1        | 5.1  | 15.8 | 10.7               |
| Slovakia        | 19.5               | 14.1       | 14.1       | 14.1 | 19.5 | 5.4                | 17.6               | 15.1       | 11.9       | 11.9 | 17.6 | 5.7                | 20.7               | 12.0       | 19.7       | 12.0 | 20.7 | 8.7                | 17.0               | 9.9        | 6.0        | 6.0  | 17.0 | 11.0               |
| Slovenia        | 18.9               | 25.3       | 24.8       | 18.9 | 25.3 | 6.4                | 18.5               | 20.6       | 27.7       | 18.5 | 27.7 | 9.2                | 19.1               | 32.3       | 19.4       | 19.1 | 32.3 | 13.2               | 28.5               | 23.0       | 31.4       | 23.0 | 31.4 | 8.4                |
| Spain           | 20.5               | 15.5       | 11.0       | 11.0 | 20.5 | 9.5                | 22.7               | 16.4       | 12.1       | 12.1 | 22.7 | 10.6               | 18.3               | 13.5       | 8.8        | 8.8  | 18.3 | 9.5                | 23.9               | 20.6       | 14.5       | 14.5 | 23.9 | 9.4                |
| Sweden          | 29.3               | 23.8       | 27.3       | 23.8 | 29.3 | 5.5                | 30.9               | 23.0       | 28.0       | 23.0 | 30.9 | 7.9                | 28.0               | 24.8       | 26.2       | 24.8 | 28.0 | 3.2                | 40.6               | 33.5       | 30.2       | 30.2 | 40.6 | 10.4               |
| min             | 4.3                | 1.8        | 1.6        |      |      |                    | 5.9                | 2.5        | 1.7        |      |      |                    | 3.1                | 1.0        | 1.3        |      |      |                    | 6.3                | 6.5        | 4.0        |      |      |                    |
| max             | 44.0               | 38.7       | 49.3       |      |      |                    | 50.3               | 42.3       | 48.2       |      |      |                    | 44.1               | 41.7       | 50.5       |      |      |                    | 45.1               | 44.2       | 43.7       |      |      |                    |
| range (max-min) | 39.7               | 36.9       | 47.7       |      |      |                    | 44.4               | 39.8       | 46.5       |      |      |                    | 41.0               | 40.7       | 49.2       |      |      |                    | 38.8               | 37.7       | 37.9       |      |      |                    |

Notes: sorted alphabetically by countries; Educational levels 0-2: Less than primary, primary and lower secondary education; Educational levels 3-4: Upper secondary and post-secondary non-tertiary education; Educational levels 5-8: Tertiary education; <sup>1</sup> difference between maximum and minimum values

**Table S5.** Self-reported UHCN by age and income groups in 2019 (%)

| Country         | Age group             |      |      |      |      |                    |                       |      |      |      |      |                    |                       |      |      |      |      |                    |                       |      |      |      |      |                    |
|-----------------|-----------------------|------|------|------|------|--------------------|-----------------------|------|------|------|------|--------------------|-----------------------|------|------|------|------|--------------------|-----------------------|------|------|------|------|--------------------|
|                 | 65+                   |      |      |      |      |                    | 65-74                 |      |      |      |      |                    | 75+                   |      |      |      |      |                    | 15-64                 |      |      |      |      |                    |
|                 | Income quintile group |      |      |      |      | range <sup>1</sup> | Income quintile group |      |      |      |      | range <sup>1</sup> | Income quintile group |      |      |      |      | range <sup>1</sup> | Income quintile group |      |      |      |      | range <sup>1</sup> |
|                 | 1.                    | 2.   | 3.   | 4.   | 5.   |                    | 1.                    | 2.   | 3.   | 4.   | 5.   |                    | 1.                    | 2.   | 3.   | 4.   | 5.   |                    | 1.                    | 2.   | 3.   | 4.   | 5.   |                    |
| Austria         | 22.0                  | 21.8 | 19.0 | 13.9 | 15.5 | 8.1                | 24.0                  | 22.6 | 21.0 | 13.3 | 15.2 | 10.7               | 20.6                  | 20.9 | 15.9 | 15.9 | 5.9  | 33.3               | 29.5                  | 24.7 | 22.8 | 22.4 | 10.9 |                    |
| Bulgaria        | 29.8                  | 22.5 | 20.1 | 13.7 | 19.8 | 16.1               | 35.3                  | 20.6 | 16.8 | 12.8 | 18.5 | 22.5               | 25.4                  | 24.5 | 26.0 | 15.5 | 23.9 | 10.5               | 24.5                  | 19.3 | 13.9 | 8.6  | 10   | 15.9               |
| Croatia         | 39.9                  | 37.6 | 43.3 | 41.5 | 36.1 | 7.2                | 40.1                  | 45.6 | 49.4 | 43.0 | 25.9 | 23.5               | 39.7                  | 31.8 | 38.1 | 40.1 | 48.6 | 16.8               | 41.4                  | 31.5 | 30.3 | 32.4 | 31.1 | 11.1               |
| Cyprus          | 10.7                  | 6.5  | 8.5  | 4.5  | 4.5  | 6.2                | 11.7                  | 7.2  | 8.2  | 5.4  | 4.1  | 7.6                | 9.7                   | 5.7  | 8.9  | 2.6  | 5.7  | 7.1                | 10.6                  | 7.5  | 4.9  | 3.8  | 2.4  | 8.2                |
| Czechia         | 24.9                  | 22.1 | 20.1 | 17.6 | 18.6 | 7.3                | 25.5                  | 19.3 | 21.6 | 18.2 | 19.6 | 7.3                | 24.4                  | 26.2 | 16.8 | 15.5 | 13.5 | 12.7               | 24.4                  | 16.4 | 14.8 | 15   | 14.3 | 10.1               |
| Denmark         | 23.1                  | 19.5 | 15.1 | 18.0 | 19.4 | 8.0                | 25.8                  | 20.1 | 13.4 | 17.6 | 21.0 | 12.4               | 20.8                  | 18.6 | 18.8 | 19.6 | 16.1 | 4.7                | 54.9                  | 43.5 | 33.7 | 28.6 | 22.9 | 32.0               |
| Estonia         | 33.2                  | 34.0 | 32.3 | 37.7 | 15.2 | 22.5               | 35.2                  | 37.7 | 28.6 | 39.4 | 15.6 | 23.8               | 31.8                  | 30.6 | 39.1 | 33.2 | N/A  | 8.5                | 49.7                  | 42.2 | 43.4 | 33.5 | 32   | 17.7               |
| Finland         | 32.6                  | 35.1 | 30.0 | 27.0 | 24.8 | 10.3               | 36.3                  | 34.1 | 29.7 | 25.0 | 24.8 | 11.5               | 26.3                  | 36.5 | 30.6 | 31.8 | 24.8 | 11.7               | 46.7                  | 43.1 | 37.5 | 34.1 | 24.8 | 21.9               |
| France          | 28.4                  | 22.4 | 18.3 | 19.5 | 20.6 | 10.1               | 37.4                  | 25.4 | 19.4 | 22.7 | 21.0 | 18.0               | 18.7                  | 19.0 | 16.6 | 14.7 | 20.0 | 5.3                | 35.3                  | 32.3 | 31.1 | 30.2 | 30.6 | 5.1                |
| Germany         | 23.4                  | 22.2 | 19.7 | 16.8 | 13.5 | 9.9                | 25.2                  | 23.0 | 20.0 | 17.4 | 15.2 | 10.0               | 21.6                  | 21.4 | 19.6 | 16.3 | 11.6 | 10.0               | 37.1                  | 32.5 | 27.9 | 27.3 | 23.5 | 13.6               |
| Greece          | 37.8                  | 31.3 | 23.9 | 16.0 | 10.4 | 27.4               | 47.0                  | 36.6 | 24.1 | 19.5 | 2.5  | 44.5               | 27.6                  | 27.2 | 23.6 | 10.7 | 23.6 | 16.9               | 39.8                  | 24   | 16.9 | 9.7  | 3.4  | 36.4               |
| Hungary         | 22.1                  | 17.0 | 19.6 | 24.6 | 19.0 | 7.6                | 24.6                  | 17.4 | 21.7 | 25.6 | 16.4 | 9.2                | 18.2                  | 16.5 | 16.7 | 23.0 | 26.5 | 10.0               | 27.6                  | 21.9 | 21.1 | 20.8 | 24.6 | 6.8                |
| Iceland         | 38.7                  | 17.2 | 21.1 | 26.0 | 24.7 | 21.5               | 53.1                  | 24.5 | 22.0 | 24.7 | 26.8 | 31.1               | 7.5                   | 10.9 | 20.4 | N/A  | N/A  | 12.9               | 33.7                  | 49.7 | 43.1 | 34.9 | 24.1 | 25.6               |
| Ireland         | 22.8                  | 19.8 | 12.2 | 3.3  | 5.2  | 19.5               | 27.0                  | 23.1 | 13.2 | 4.2  | N/A  | 22.8               | 17.6                  | 14.7 | 9.7  | N/A  | N/A  | 7.9                | 35.5                  | 29.1 | 22   | 23.8 | 17   | 18.5               |
| Italy           | 37.8                  | 33.2 | 28.7 | 27.0 | 26.1 | 11.7               | 36.6                  | 35.0 | 28.0 | 26.2 | 24.1 | 12.5               | 39.1                  | 31.7 | 29.4 | 28.0 | 28.8 | 11.1               | 33.4                  | 27.4 | 25.1 | 21.7 | 19.4 | 14.0               |
| Latvia          | 44.6                  | 36.6 | 28.3 | 21.8 | 17.3 | 27.3               | 56.7                  | 44.6 | 27.7 | 24.0 | 15.4 | 41.3               | 35.8                  | 28.2 | 29.4 | 16.6 | 20.6 | 19.2               | 62.5                  | 43.5 | 34.3 | 30.8 | 26   | 36.5               |
| Lithuania       | 29.1                  | 26.4 | 24.6 | 24.6 | 20.5 | 8.6                | 32.1                  | 29.3 | 21.8 | 23.9 | N/A  | 10.3               | 26.9                  | 23.1 | 28.4 | 25.9 | N/A  | 5.3                | 37                    | 31.7 | 25.6 | 25.2 | 26.1 | 11.8               |
| Luxembourg      | 31.7                  | 26.8 | 23.3 | 16.3 | 36.2 | 19.9               | 33.1                  | 25.6 | 18.0 | 13.3 | 33.7 | 20.4               | 28.4                  | 28.7 | 39.1 | 29.3 | N/A  | 10.7               | 49.3                  | 44.3 | 37.2 | 39.7 | 39.4 | 12.1               |
| Malta           | 25.2                  | 25.6 | 27.9 | 27.0 | 19.0 | 8.9                | 24.7                  | 23.4 | 31.2 | 24.7 | 21.6 | 9.6                | 26.2                  | 28.7 | 21.8 | 31.1 | N/A  | 9.3                | 24.2                  | 27   | 18.9 | 16.8 | 19.6 | 10.2               |
| Netherlands     | 13.1                  | 13.8 | 11.3 | 8.1  | 9.1  | 5.7                | 13.7                  | 13.3 | 11.5 | 7.1  | 9.4  | 6.6                | N/A                   | 14.6 | 11.1 | 9.6  | 8.8  | 5.8                | 23.4                  | 22.5 | 13.7 | 13   | 11.8 | 11.6               |
| Norway          | 4.6                   | 2.4  | 2.5  | 1.2  | 1.0  | 3.6                | 7.6                   | 4.0  | 2.8  | 1.6  | 0.9  | 6.7                | 2.7                   | 1.2  | 2.2  | 0.0  | 1.6  | 2.7                | 26.5                  | 17   | 12.9 | 8.3  | 7.4  | 19.1               |
| Poland          | 45.8                  | 38.2 | 37.1 | 34.1 | 33.5 | 12.3               | 46.7                  | 37.8 | 37.9 | 34.5 | 29.5 | 17.2               | 45.0                  | 38.7 | 35.9 | 33.4 | 41.1 | 11.6               | 36                    | 29.4 | 29.2 | 26.2 | 24.4 | 11.6               |
| Portugal        | 54.6                  | 46.5 | 44.3 | 37.6 | 22.5 | 32.1               | 53.4                  | 48.0 | 43.6 | 36.5 | 24.8 | 28.6               | 55.9                  | 45.4 | 45.1 | 38.9 | 18.3 | 37.6               | 46.5                  | 44.7 | 41.5 | 38.3 | 26.5 | 20.0               |
| Romania         | 30.2                  | 25.2 | 24.3 | 23.2 | 14.5 | 15.7               | 33.0                  | 25.5 | 24.8 | 21.9 | 14.1 | 18.9               | 28.1                  | 24.8 | 23.5 | 25.6 | 15.1 | 13.0               | 17.9                  | 11.3 | 11.4 | 9    | 5.5  | 12.4               |
| Slovakia        | 12.9                  | 20.9 | 15.2 | 10.0 | 14.0 | 10.9               | 11.7                  | 20.2 | 14.3 | 11.9 | 14.5 | 8.5                | 15.1                  | 21.8 | 16.5 | 7.0  | 12.1 | 14.8               | 15                    | 11.5 | 8    | 8.6  | 6.4  | 8.6                |
| Slovenia        | 24.6                  | 21.6 | 21.2 | 24.1 | 21.8 | 3.4                | 26.0                  | 23.1 | 21.3 | 25.4 | 23.6 | 4.7                | 23.7                  | 19.5 | 20.8 | 21.9 | 19.6 | 4.2                | 30.8                  | 31   | 30.2 | 29.4 | 28.3 | 2.7                |
| Spain           | 26.3                  | 21.0 | 19.3 | 15.0 | 14.8 | 11.5               | 31.9                  | 23.6 | 21.6 | 16.7 | 14.9 | 17.0               | 20.6                  | 19.3 | 16.9 | 12.5 | 14.5 | 8.1                | 26.4                  | 22.2 | 21.1 | 16.2 | 12.4 | 14.0               |
| Sweden          | 34.4                  | 29.9 | 25.3 | 22.2 | 19.7 | 14.7               | 40.7                  | 34.3 | 24.2 | 22.0 | 20.1 | 20.6               | 30.5                  | 27.1 | 26.7 | 22.8 | 18.7 | 11.8               | 48.8                  | 44.1 | 34.2 | 29.6 | 23.3 | 25.5               |
| min             | 4.6                   | 2.4  | 2.5  | 1.2  | 1.0  |                    | 7.6                   | 4.0  | 2.8  | 1.6  | 0.9  |                    | 2.7                   | 1.2  | 2.2  | 0.0  | 1.6  |                    | 10.6                  | 7.5  | 4.9  | 3.8  | 2.4  |                    |
| max             | 54.6                  | 46.5 | 44.3 | 41.5 | 36.2 |                    | 56.7                  | 48.0 | 49.4 | 43.0 | 33.7 |                    | 55.9                  | 45.4 | 45.1 | 40.1 | 48.6 |                    | 62.5                  | 49.7 | 43.4 | 39.7 | 39.4 |                    |
| range (max-min) | 50.0                  | 44.1 | 41.8 | 40.3 | 35.2 |                    | 49.1                  | 44.0 | 46.6 | 41.4 | 32.8 |                    | 53.2                  | 44.2 | 42.9 | 40.1 | 47.0 |                    | 51.9                  | 42.2 | 38.5 | 35.9 | 37.0 |                    |

Notes: sorted alphabetically by countries; <sup>1</sup> difference between maximum and minimum values; N/A: data not available

**Table S6.** Self-reported UHCN by age and urbanization group in 2019 (%)

| Country         | Age group          |                   |       |      |      |                    |                    |                   |       |      |      |                    |                    |                   |       |      |      |                    |                    |                   |       |      |      |                    |
|-----------------|--------------------|-------------------|-------|------|------|--------------------|--------------------|-------------------|-------|------|------|--------------------|--------------------|-------------------|-------|------|------|--------------------|--------------------|-------------------|-------|------|------|--------------------|
|                 | 65+                |                   |       |      |      |                    | 65-74              |                   |       |      |      |                    | 75+                |                   |       |      |      |                    | 15-64              |                   |       |      |      |                    |
|                 | Urbanization group |                   |       |      |      |                    | Urbanization group |                   |       |      |      |                    | Urbanization group |                   |       |      |      |                    | Urbanization group |                   |       |      |      |                    |
|                 | Cities             | Towns/<br>suburbs | Rural | min  | max  | range <sup>1</sup> | Cities             | Towns/<br>suburbs | Rural | min  | max  | range <sup>1</sup> | Cities             | Towns/<br>suburbs | Rural | min  | max  | range <sup>1</sup> | Cities             | Towns/<br>suburbs | Rural | min  | max  | range <sup>1</sup> |
| Austria         | 19.8               | 19.3              | 20.7  | 19.3 | 20.7 | 1.4                | 19.9               | 18.8              | 22.9  | 18.8 | 22.9 | 4.1                | 19.7               | 19.9              | 18.3  | 18.3 | 19.9 | 1.6                | 31.5               | 24.8              | 23.1  | 23.1 | 31.5 | 8.4                |
| Bulgaria        | 23.1               | 18.2              | 25.8  | 18.2 | 25.8 | 7.6                | 20.6               | 16.4              | 28.4  | 16.4 | 28.4 | 12                 | 27.4               | 20.4              | 23.0  | 20.4 | 27.4 | 7                  | 12.6               | 10.6              | 16.8  | 10.6 | 16.8 | 6.2                |
| Croatia         | 43.0               | 42.0              | 35.3  | 35.3 | 43   | 7.7                | 38.6               | 41.1              | 36.8  | 36.8 | 41.1 | 4.3                | 46.8               | 42.9              | 34.0  | 34   | 46.8 | 12.8               | 30.6               | 31.6              | 24.5  | 24.5 | 31.6 | 7.1                |
| Cyprus          | 6.8                | 13.3              | 5.2   | 5.2  | 13.3 | 8.1                | 7.1                | 12.5              | 5.7   | 5.7  | 12.5 | 6.8                | 6.4                | 14.8              | 4.5   | 4.5  | 14.8 | 10.3               | 4.5                | 9.9               | 4.1   | 4.1  | 9.9  | 5.8                |
| Czechia         | 21.0               | 22.9              | 21.9  | 21   | 22.9 | 1.9                | 21.3               | 22.5              | 20.2  | 20.2 | 22.5 | 2.3                | 20.7               | 23.5              | 24.9  | 20.7 | 24.9 | 4.2                | 19.1               | 17.2              | 13.8  | 13.8 | 19.1 | 5.3                |
| Denmark         | 21.7               | 20.9              | 20.5  | 20.5 | 21.7 | 1.2                | 22.3               | 21.0              | 19.9  | 19.9 | 22.3 | 2.4                | 20.8               | 20.7              | 21.4  | 20.7 | 21.4 | 0.7                | 38.3               | 36.7              | 35.4  | 35.4 | 38.3 | 2.9                |
| Estonia         | 35.4               | 39.8              | 27.0  | 27   | 39.8 | 12.8               | 36.0               | 41.7              | 28.2  | 28.2 | 41.7 | 13.5               | 34.7               | 37.7              | 25.7  | 25.7 | 37.7 | 12                 | 41.2               | 34.7              | 34.1  | 34.1 | 41.2 | 7.1                |
| Finland         | 33.8               | 32.7              | 25.4  | 25.4 | 33.8 | 8.4                | 34.6               | 30.8              | 22.9  | 22.9 | 34.6 | 11.7               | 32.6               | 36.5              | 29.8  | 29.8 | 36.5 | 6.7                | 43                 | 37.2              | 31.1  | 31.1 | 43.0 | 11.9               |
| France          | 22.2               | 21.2              | 21.2  | 21.2 | 22.2 | 1                  | 26.1               | 23.3              | 23.6  | 23.3 | 26.1 | 2.8                | 17.5               | 18.2              | 17.8  | 17.5 | 18.2 | 0.7                | 34.8               | 29.6              | 30.7  | 29.6 | 34.8 | 5.2                |
| Germany         | 19.5               | 19.3              | 19.3  | 19.3 | 19.5 | 0.2                | 20.3               | 19.9              | 21.8  | 19.9 | 21.8 | 1.9                | 18.8               | 18.8              | 16.8  | 16.8 | 18.8 | 2                  | 32.8               | 27.2              | 26.7  | 26.7 | 32.8 | 6.1                |
| Greece          | 23.9               | 22.8              | 23.1  | 22.8 | 23.9 | 1.1                | 25.5               | 25.6              | 24.1  | 24.1 | 25.6 | 1.5                | 22.0               | 19.2              | 22.3  | 19.2 | 22.3 | 3.1                | 19                 | 16.5              | 18.6  | 16.5 | 19.0 | 2.5                |
| Hungary         | 23.6               | 19.3              | 17.4  | 17.4 | 23.6 | 6.2                | 23.4               | 21.9              | 18.8  | 18.8 | 23.4 | 4.6                | 23.7               | 15.6              | 15.2  | 15.2 | 23.7 | 8.5                | 27.4               | 23.4              | 18.4  | 18.4 | 27.4 | 9.0                |
| Iceland         | 21.6               | 27.6              | 18.3  | 18.3 | 27.6 | 9.3                | 26.7               | 37.6              | 18.0  | 18   | 37.6 | 19.6               | 13.8               | 15.5              | 18.5  | 13.8 | 18.5 | 4.7                | 35.6               | 38                | 35.9  | 35.6 | 38.0 | 2.4                |
| Ireland         | 19.4               | 16.1              | 17.3  | 16.1 | 19.4 | 3.3                | 21.2               | 15.1              | 18.9  | 15.1 | 21.2 | 6.1                | 16.4               | 17.4              | 15.0  | 15   | 17.4 | 2.4                | 26.6               | 24.1              | 21.4  | 21.4 | 26.6 | 5.2                |
| Italy           | 29.9               | 30.7              | 28.3  | 28.3 | 30.7 | 2.4                | 28.1               | 29.7              | 28.9  | 28.1 | 29.7 | 1.6                | 31.9               | 31.7              | 27.8  | 27.8 | 31.9 | 4.1                | 25.9               | 24.7              | 25.5  | 24.7 | 25.9 | 1.2                |
| Latvia          | 40.5               | 35.1              | 32.3  | 32.3 | 40.5 | 8.2                | 46.9               | 38.1              | 36.0  | 36   | 46.9 | 10.9               | 33.3               | 32.3              | 28.3  | 28.3 | 33.3 | 5                  | 41.4               | 31.5              | 34.7  | 31.5 | 41.4 | 9.9                |
| Lithuania       | 31.7               | 24.5              | 20.3  | 20.3 | 31.7 | 11.4               | 32.7               | 20.7              | 21.3  | 20.7 | 32.7 | 12                 | 30.6               | 28.7              | 19.3  | 19.3 | 30.6 | 11.3               | 29.5               | 22.3              | 24.2  | 22.3 | 29.5 | 7.2                |
| Luxembourg      | 27.3               | 27.5              | 25.1  | 25.1 | 27.5 | 2.4                | 25.1               | 25.1              | 22.0  | 22   | 25.1 | 3.1                | 30.5               | 33.5              | 34.4  | 30.5 | 34.4 | 3.9                | 46                 | 41.2              | 38.7  | 38.7 | 46.0 | 7.3                |
| Malta           | 28.0               | 23.1              | 22.5  | 22.5 | 28   | 5.5                | 27.8               | 22.4              | 18.6  | 18.6 | 27.8 | 9.2                | 28.3               | 24.3              | n/a   | 24.3 | 28.3 | 4                  | 21.5               | 19.7              | 12.4  | 12.4 | 21.5 | 9.1                |
| Netherlands     | 9.5                | 10.5              | 11.7  | 9.5  | 11.7 | 2.2                | 8.6                | 10.9              | 12.0  | 8.6  | 12   | 3.4                | 10.8               | 9.9               | 11.3  | 9.9  | 11.3 | 1.4                | 19.5               | 13.7              | 13.7  | 13.7 | 19.5 | 5.8                |
| Norway          | 1.7                | 2.1               | 3.1   | 1.7  | 3.1  | 1.4                | 2.9                | 1.9               | 4.0   | 1.9  | 4    | 2.1                | 0                  | 2.4               | 1.9   | 0    | 2.4  | 2.4                | 14.8               | 14.2              | 13.8  | 13.8 | 14.8 | 1.0                |
| Poland          | 42.9               | 36.9              | 33.4  | 33.4 | 42.9 | 9.5                | 42.6               | 36.8              | 33.3  | 33.3 | 42.6 | 9.3                | 43.3               | 37.1              | 33.5  | 33.5 | 43.3 | 9.8                | 33.1               | 26.3              | 23    | 23.0 | 33.1 | 10.1               |
| Portugal        | 38.2               | 41.0              | 46.7  | 38.2 | 46.7 | 8.5                | 36.9               | 39.7              | 48.9  | 36.9 | 48.9 | 12                 | 39.8               | 42.6              | 44.7  | 39.8 | 44.7 | 4.9                | 40                 | 38.4              | 39.8  | 38.4 | 40.0 | 1.6                |
| Romania         | 25.8               | 26.2              | 22.8  | 22.8 | 26.2 | 3.4                | 24.2               | 27.6              | 22.9  | 22.9 | 27.6 | 4.7                | 28.3               | 24.2              | 22.7  | 22.7 | 28.3 | 5.6                | 7.5                | 12.2              | 11.7  | 7.5  | 12.2 | 4.7                |
| Slovakia        | 22.9               | 11.2              | 14.7  | 11.2 | 22.9 | 11.7               | 23.6               | 10.3              | 14.4  | 10.3 | 23.6 | 13.3               | 21.9               | 12.7              | 15.1  | 12.7 | 21.9 | 9.2                | 12.8               | 7.8               | 9.4   | 7.8  | 12.8 | 5.0                |
| Slovenia        | 26.4               | 24.5              | 19.8  | 19.8 | 26.4 | 6.6                | 26.3               | 25.9              | 20.5  | 20.5 | 26.3 | 5.8                | 26.6               | 22.8              | 19.1  | 19.1 | 26.6 | 7.5                | 37.1               | 30.7              | 26.6  | 26.6 | 37.1 | 10.5               |
| Spain           | 17.1               | 21.0              | 19.3  | 17.1 | 21   | 3.9                | 18.0               | 23.1              | 20.9  | 18   | 23.1 | 5.1                | 15.9               | 18.3              | 17.7  | 15.9 | 18.3 | 2.4                | 19.7               | 20.8              | 18.4  | 18.4 | 20.8 | 2.4                |
| Sweden          | 27.7               | 26.6              | 25.0  | 25   | 27.7 | 2.7                | 29.3               | 25.2              | 25.8  | 25.2 | 29.3 | 4.1                | 26.1               | 28.3              | 23.9  | 23.9 | 28.3 | 4.4                | 35.1               | 33.1              | 30.9  | 30.9 | 35.1 | 4.2                |
| min             | 1.7                | 2.1               | 3.1   |      |      |                    | 2.9                | 1.9               | 4     |      |      |                    | 0                  | 2.4               | 1.9   |      |      |                    | 4.5                | 7.8               | 4.1   |      |      |                    |
| max             | 43                 | 42                | 46.7  |      |      |                    | 46.9               | 41.7              | 48.9  |      |      |                    | 46.8               | 42.9              | 44.7  |      |      |                    | 46.0               | 41.2              | 39.8  |      |      |                    |
| range (max-min) | 41.3               | 39.9              | 43.6  |      |      |                    | 44                 | 39.8              | 44.9  |      |      |                    | 46.8               | 40.5              | 42.8  |      |      |                    | 41.5               | 33.4              | 35.7  |      |      |                    |

Notes: sorted alphabetically by countries; <sup>1</sup> difference between maximum and minimum values

**Table S7.** Self-reported UHCN by age and activity limitation level in 2019 (%)

| Country         | Age group           |               |        |      |      |                    |                     |               |        |      |      |                    |                     |               |        |      |      |                    |                     |               |        |      |      |                    |
|-----------------|---------------------|---------------|--------|------|------|--------------------|---------------------|---------------|--------|------|------|--------------------|---------------------|---------------|--------|------|------|--------------------|---------------------|---------------|--------|------|------|--------------------|
|                 | 65+                 |               |        |      |      |                    | 65-74               |               |        |      |      |                    | 75+                 |               |        |      |      |                    | 15-64               |               |        |      |      |                    |
|                 | Activity limitation |               |        |      |      |                    | Activity limitation |               |        |      |      |                    | Activity limitation |               |        |      |      |                    | Activity limitation |               |        |      |      |                    |
|                 | None                | Mode-<br>rate | Severe | min  | max  | range <sup>1</sup> | None                | Mode-<br>rate | Severe | min  | max  | range <sup>1</sup> | None                | Mode-<br>rate | Severe | min  | max  | range <sup>1</sup> | None                | Mode-<br>rate | Severe | min  | max  | range <sup>1</sup> |
| Austria         | 15.3                | 22.0          | 28.7   | 15.3 | 28.7 | 13.4               | 15.9                | 24.6          | 35.9   | 15.9 | 35.9 | 20.0               | 14.3                | 19.3          | 25.7   | 14.3 | 25.7 | 11.4               | 22.4                | 35.4          | 47.3   | 22.4 | 47.3 | 24.9               |
| Bulgaria        | 13.2                | 28.5          | 33.9   | 13.2 | 33.9 | 20.7               | 12.9                | 29.4          | 38.7   | 12.9 | 38.7 | 25.8               | 14.0                | 27.5          | 31.4   | 14   | 31.4 | 17.4               | 10.4                | 26.7          | 26.0   | 10.4 | 26.7 | 16.3               |
| Croatia         | 32.8                | 37.7          | 50.7   | 32.8 | 50.7 | 17.9               | 30.3                | 39.5          | 51.8   | 30.3 | 51.8 | 21.5               | 37.8                | 36.0          | 50.2   | 36   | 50.2 | 14.2               | 23.6                | 39.0          | 51.1   | 23.6 | 51.1 | 27.5               |
| Cyprus          | 5.1                 | 9.6           | 12.7   | 5.1  | 12.7 | 7.6                | 5.4                 | 12.9          | 13.4   | 5.4  | 13.4 | 8.0                | 4.7                 | 6.1           | 12.3   | 4.7  | 12.3 | 7.6                | 4.5                 | 11.9          | 19.1   | 4.5  | 19.1 | 14.6               |
| Czechia         | 15.7                | 23.1          | 35.3   | 15.7 | 35.3 | 19.6               | 16.0                | 25.4          | 34.2   | 16   | 34.2 | 18.2               | 14.6                | 20.4          | 36.0   | 14.6 | 36   | 21.4               | 13.0                | 25.7          | 45.3   | 13.0 | 45.3 | 32.3               |
| Denmark         | 14.2                | 26.4          | 39.5   | 14.2 | 39.5 | 25.3               | 15.0                | 28.1          | 44.6   | 15   | 44.6 | 29.6               | 12.5                | 24.7          | 35.3   | 12.5 | 35.3 | 22.8               | 31.4                | 48.5          | 68.1   | 31.4 | 68.1 | 36.7               |
| Estonia         | 23.7                | 36.6          | 38.7   | 23.7 | 38.7 | 15.0               | 26.5                | 39.1          | 38.3   | 26.5 | 39.1 | 12.6               | 18.7                | 34.1          | 38.9   | 18.7 | 38.9 | 20.2               | 31.8                | 48.8          | 61.6   | 31.8 | 61.6 | 29.8               |
| Finland         | 21.2                | 37.8          | 62.4   | 21.2 | 62.4 | 41.2               | 20.9                | 38.6          | 67.8   | 20.9 | 67.8 | 46.9               | 21.9                | 36.7          | 57.7   | 21.9 | 57.7 | 35.8               | 30.7                | 52.8          | 66.4   | 30.7 | 66.4 | 35.7               |
| France          | 18.1                | 24.7          | 28.6   | 18.1 | 28.6 | 10.5               | 20.6                | 29.1          | 34.1   | 20.6 | 34.1 | 13.5               | 13.7                | 19.7          | 24.6   | 13.7 | 24.6 | 10.9               | 28.9                | 42.8          | 48.1   | 28.9 | 48.1 | 19.2               |
| Germany         | 12.3                | 22.4          | 34.2   | 12.3 | 34.2 | 21.9               | 13.4                | 24.0          | 41.7   | 13.4 | 41.7 | 28.3               | 11.0                | 21.4          | 29.6   | 11   | 29.6 | 18.6               | 23.2                | 40.8          | 53.0   | 23.2 | 53.0 | 29.8               |
| Greece          | 17.6                | 36.7          | 36.4   | 17.6 | 36.7 | 19.1               | 19.2                | 42.4          | 50.6   | 19.2 | 50.6 | 31.4               | 15.6                | 32.3          | 30.1   | 15.6 | 32.3 | 16.7               | 17.0                | 32.9          | 39.7   | 17.0 | 39.7 | 22.7               |
| Hungary         | 16.9                | 21.6          | 27.3   | 16.9 | 27.3 | 10.4               | 16.7                | 26.5          | 28.1   | 16.7 | 28.1 | 11.4               | 17.3                | 15.3          | 26.8   | 15.3 | 26.8 | 11.5               | 19.2                | 38.3          | 43.6   | 19.2 | 43.6 | 24.4               |
| Iceland         | 15.1                | 24.9          | 43.0   | 15.1 | 43   | 27.9               | 17.1                | 32.4          | 57.4   | 17.1 | 57.4 | 40.3               | 12.3                | 15.1          | 24.5   | 12.3 | 24.5 | 12.2               | 29.0                | 51.8          | 70.4   | 29.0 | 70.4 | 41.4               |
| Ireland         | 13.5                | 21.7          | 35.7   | 13.5 | 35.7 | 22.2               | 13.5                | 28.1          | 44.7   | 13.5 | 44.7 | 31.2               | 13.4                | 13.8          | 28.6   | 13.4 | 28.6 | 15.2               | 20.6                | 43.6          | 45.1   | 20.6 | 45.1 | 24.5               |
| Italy           | 24.0                | 33.4          | 40.1   | 24   | 40.1 | 16.1               | 23.2                | 36.1          | 41.6   | 23.2 | 41.6 | 18.4               | 25.2                | 31.2          | 39.5   | 25.2 | 39.5 | 14.3               | 22.1                | 39.7          | 47.3   | 22.1 | 47.3 | 25.2               |
| Latvia          | 22.1                | 38.4          | 48.4   | 22.1 | 48.4 | 26.3               | 24.6                | 47.7          | 57.8   | 24.6 | 57.8 | 33.2               | 16.5                | 28.8          | 43.5   | 16.5 | 43.5 | 27.0               | 27.7                | 48.7          | 65.0   | 27.7 | 65.0 | 37.3               |
| Lithuania       | 21.1                | 32.3          | 31.7   | 21.1 | 32.3 | 11.2               | 23.0                | 34.1          | 30.2   | 23   | 34.1 | 11.1               | 18.1                | 31.0          | 32.3   | 18.1 | 32.3 | 14.2               | 23.0                | 43.0          | 50.8   | 23.0 | 50.8 | 27.8               |
| Luxembourg      | 19.2                | 35.8          | 52.4   | 19.2 | 52.4 | 33.2               | 17.2                | 34.6          | n/a    | 17.2 | 34.6 | 17.4               | 26.1                | 38.3          | 47.5   | 26.1 | 47.5 | 21.4               | 37.4                | 57.3          | 68.7   | 37.4 | 68.7 | 31.3               |
| Malta           | 19.4                | 32.3          | 41.7   | 19.4 | 41.7 | 22.3               | 19.8                | 33.8          | 39.1   | 19.8 | 39.1 | 19.3               | 18.4                | 30.6          | 44.0   | 18.4 | 44   | 25.6               | 17.9                | 32.1          | 45.1   | 17.9 | 45.1 | 27.2               |
| Netherlands     | 6.6                 | 11.4          | 21.7   | 6.6  | 21.7 | 15.1               | 6.7                 | 11.6          | 23.5   | 6.7  | 23.5 | 16.8               | 6.5                 | 11.2          | 20.3   | 6.5  | 20.3 | 13.8               | 12.3                | 24.7          | 48.0   | 12.3 | 48.0 | 35.7               |
| Norway          | 1.4                 | 3.6           | 9.0    | 1.4  | 9.0  | 7.6                | 1.8                 | 4.2           | 11.3   | 1.8  | 11.3 | 9.5                | 0.9                 | 2.7           | 6.5    | 0.9  | 6.5  | 5.6                | 11.3                | 23.7          | 38.1   | 11.3 | 38.1 | 26.8               |
| Poland          | 28.3                | 43.8          | 47.6   | 28.3 | 47.6 | 19.3               | 29.1                | 45.7          | 53.0   | 29.1 | 53   | 23.9               | 26.0                | 41.5          | 44.4   | 26   | 44.4 | 18.4               | 22.5                | 45.6          | 57.9   | 22.5 | 57.9 | 35.4               |
| Portugal        | 29.6                | 50.3          | 56.2   | 29.6 | 56.2 | 26.6               | 32.0                | 51.4          | 62.7   | 32   | 62.7 | 30.7               | 25.4                | 49.3          | 53.9   | 25.4 | 53.9 | 28.5               | 34.1                | 62.7          | 64.5   | 34.1 | 64.5 | 30.4               |
| Romania         | 16.3                | 27.6          | 40.3   | 16.3 | 40.3 | 24.0               | 16.7                | 29.6          | 53.0   | 16.7 | 53   | 36.3               | 15.5                | 25.1          | 35.3   | 15.5 | 35.3 | 19.8               | 7.8                 | 31.4          | 47.5   | 7.8  | 47.5 | 39.7               |
| Slovakia        | 8.9                 | 15.9          | 23.2   | 8.9  | 23.2 | 14.3               | 9.1                 | 15.4          | 29.0   | 9.1  | 29   | 19.9               | 8.0                 | 16.7          | 19.4   | 8    | 19.4 | 11.4               | 6.2                 | 15.8          | 32.6   | 6.2  | 32.6 | 26.4               |
| Slovenia        | 16.2                | 25.9          | 30.1   | 16.2 | 30.1 | 13.9               | 17.3                | 29.2          | 29.4   | 17.3 | 29.4 | 12.1               | 14.2                | 21.8          | 30.5   | 14.2 | 30.5 | 16.3               | 25.4                | 39.3          | 52.6   | 25.4 | 52.6 | 27.2               |
| Spain           | 13.7                | 24.2          | 31.5   | 13.7 | 31.5 | 17.8               | 14.8                | 29.0          | 40.5   | 14.8 | 40.5 | 25.7               | 11.8                | 20.6          | 25.9   | 11.8 | 25.9 | 14.1               | 16.2                | 37.5          | 51.4   | 16.2 | 51.4 | 35.2               |
| Sweden          | 18.8                | 34.0          | 37.2   | 18.8 | 37.2 | 18.4               | 18.5                | 37.1          | 45.9   | 18.5 | 45.9 | 27.4               | 19.3                | 31.0          | 32.1   | 19.3 | 32.1 | 12.8               | 25.0                | 50.6          | 63.8   | 25.0 | 63.8 | 38.8               |
| min             | 1.4                 | 3.6           | 9      |      |      |                    | 1.8                 | 4.2           | 11.3   |      |      |                    | 0.9                 | 2.7           | 6.5    |      |      |                    | 4.5                 | 11.9          | 19.1   |      |      |                    |
| max             | 32.8                | 50.3          | 62.4   |      |      |                    | 32                  | 51.4          | 67.8   |      |      |                    | 37.8                | 49.3          | 57.7   |      |      |                    | 37.4                | 62.7          | 70.4   |      |      |                    |
| range (max-min) | 31.4                | 46.7          | 53.4   |      |      |                    | 30.2                | 47.2          | 56.5   |      |      |                    | 36.9                | 46.6          | 51.2   |      |      |                    | 32.9                | 50.8          | 51.3   |      |      |                    |

Notes: sorted alphabetically by countries; <sup>1</sup> difference between maximum and minimum values
